# Supplementary material for: Long non-coding RNA-mediated transcriptional interference of a permease gene confers drug tolerance in fission yeast
Source: PubMed Central journal article supplement (PMC4255232; doi:10.1038/ncomms6576), 2014-11-27
Supplement: NIHMS60709-supplement-1.pdf [file NIHMS60709-supplement-1.pdf]

Ard\_Supplementary-Figure-1

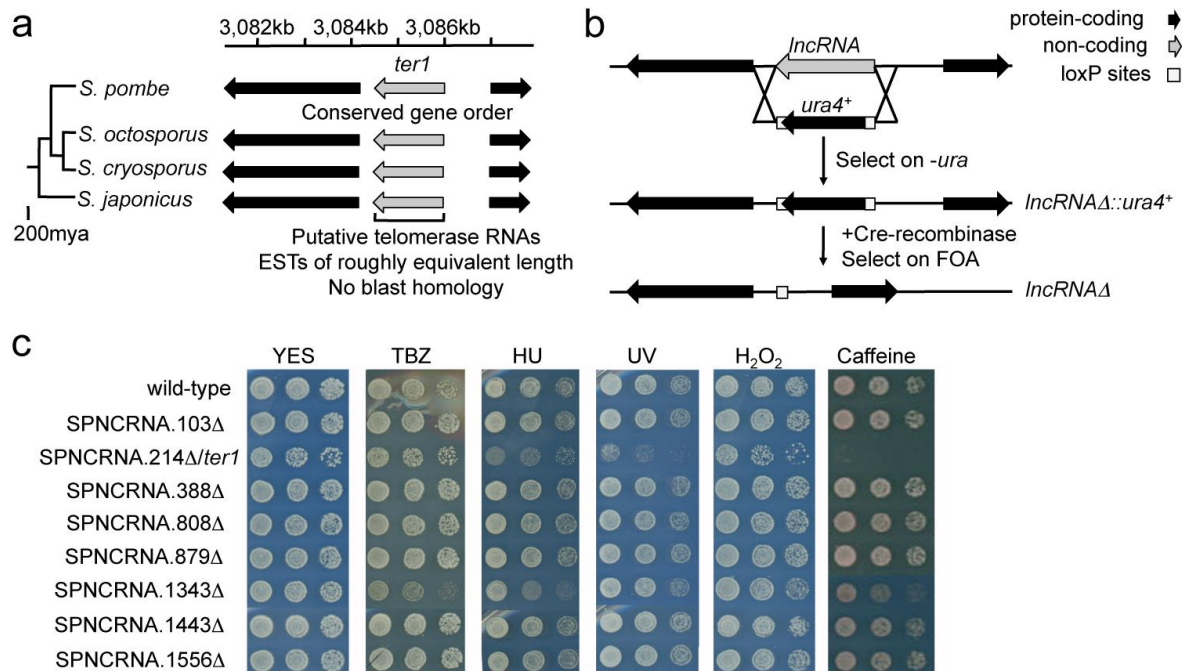

**Supplementary Figure 1. Deletion of the IncRNA locus SPNCRNA.1343 results in sensitivity to multiple drugs.** (a) Schematic representation of *S. pombe* IncRNA (in this case: SPNCRNA.214, telomerase RNA or *ter1*) with conserved synteny in related *Schizosaccharomyces* species. (b) Schematic diagram of the strategy employed to delete IncRNAs in *S. pombe*. (c) Serial dilutions of IncRNA deletions were spotted on non-selective YES medium or in the presence of various stresses, including exposure to the microtubule destabilizing drug thiabendazole (TBZ; 20  $\mu$ g/mL), DNA synthesis inhibitor hydroxyurea (HU; 10 mM), UV-irradiation (80 J/m<sup>2</sup>), oxidative stress (H<sub>2</sub>O<sub>2</sub>; 1 mM), or caffeine (15 mM).

Ard\_Supplementary-Figure-2

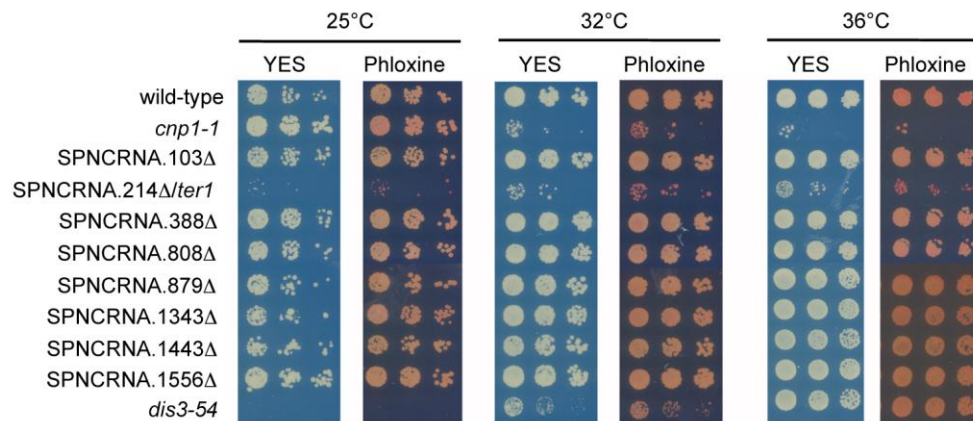

**Supplementary Figure 2. IncRNA deletions, excluding *ter1*<sup>+</sup> control, are viable at 25, 32, and 36°C.** Serial dilutions of IncRNA candidate deletions were spotted on non-selective YES medium or on plates containing phloxine B, which indicates the proportion of dead cells in a colony. *cnp1-1* and *dis3-54* are temperature-sensitive strain controls.

Ard\_Supplementary-Figure-3

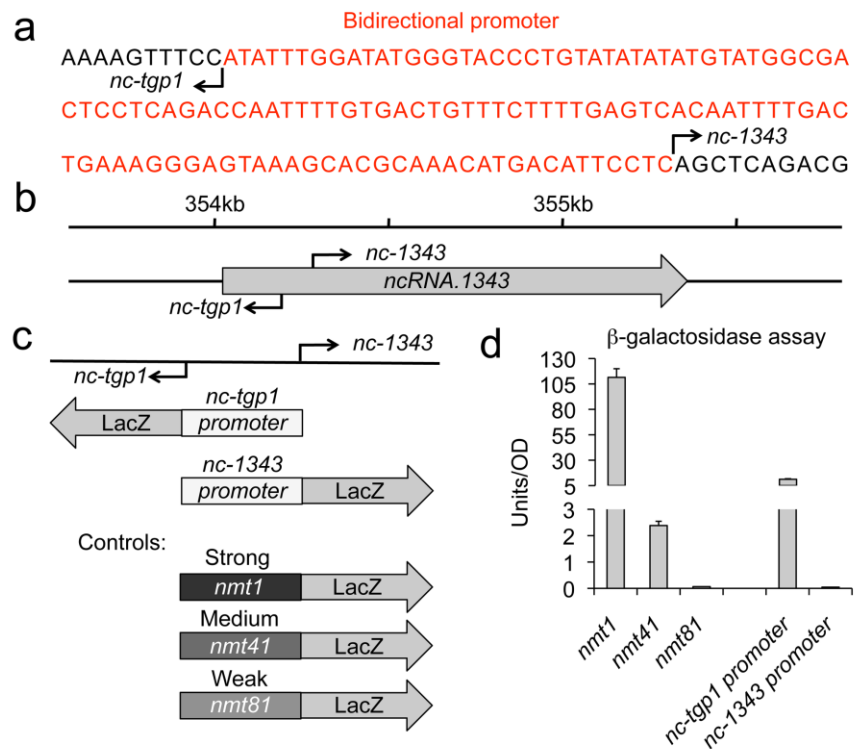

**Supplementary Figure 3. A bidirectional lncRNA promoter upstream of *tgp1*<sup>+</sup> preferentially drives transcription of *nc-tgp1*.** (a) Transcription start sites (TSSs) for *nc-tgp1* and *nc-1343* were mapped by 5'RACE and indicated by arrows. Bidirectional non-coding promoter is underlined and displayed in red. (b) Schematic of *nc-tgp1* and *nc-1343* TSSs depicted within the annotated SPNCRNA.1343 locus. (c) Diagram of LacZ reporter under the control of the bidirectional promoter encoded within the *ncRNA.1343* locus (in both orientations) or control *nmt* promoters of varying strength (as indicated). (d) β-galactosidase assays from wild-type cells transformed with LacZ vectors.

Ard\_Supplementary-Figure-4

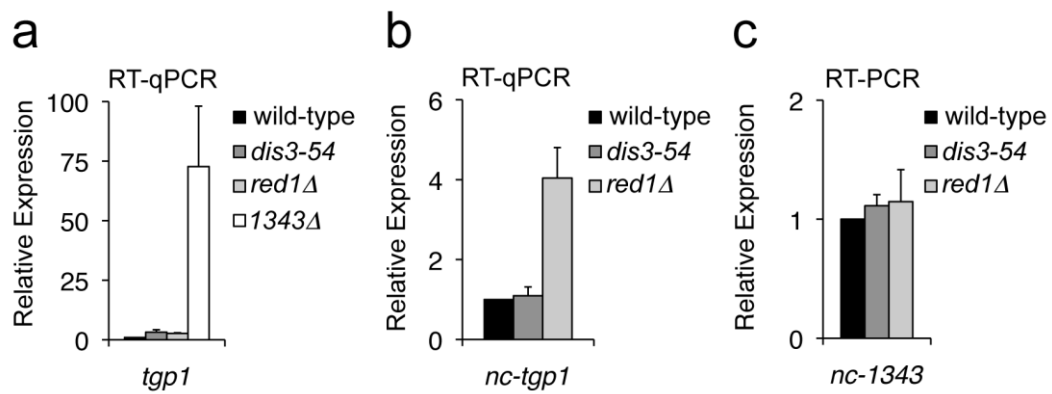

**Supplementary Figure 4. Transcript levels at the *tgp1*<sup>+</sup> locus in Dis3 and Red1 mutants.** RT-qPCR experiments to measure *tgp1*<sup>+</sup> (a), *nc-tgp1* (b), and *nc-1343* (c) transcript levels in wild-type, *dis3-54* and *red1Δ*. RNA levels quantified as relative to wild-type after normalization to *act1*<sup>+</sup>; error bars indicate standard error from three independent experiments.

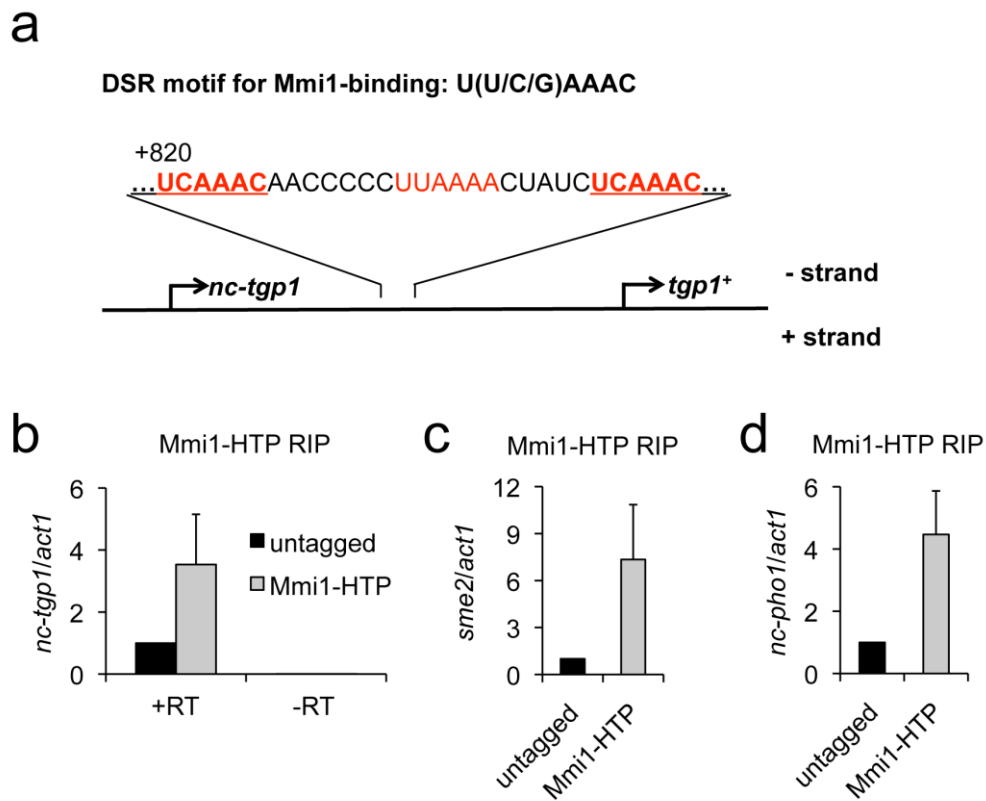

**Supplementary Figure 5. *nc-tgp1* contains putative DSR sites for Mmi1-binding. (a)**

Schematic showing three putative DSR elements (two canonical: bold red text/underlined; one suboptimal: red text) embedded within the *nc-tgp1* transcription unit. Mmi1-HTP RIP and quantification by RT-qPCR for (a) *nc-tgp1*, (b) *sme2*<sup>+</sup>, and (c) *nc-pho1* binding. Error bars indicate standard error from two independent experiments.

Ard\_Supplementary-Figure-6

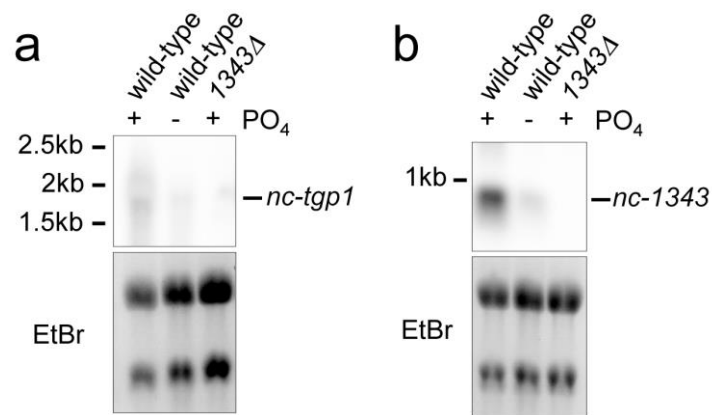

**Supplementary Figure 6. Decreased *nc-tgp1* and *nc-1343* lncRNA levels following phosphate starvation.** Northern analysis of *nc-tgp1* (a) and *nc-1343* (b) in the presence or absence of phosphate, and *1343*Δ grown in the presence of phosphate.

Ard\_Supplementary-Figure-7

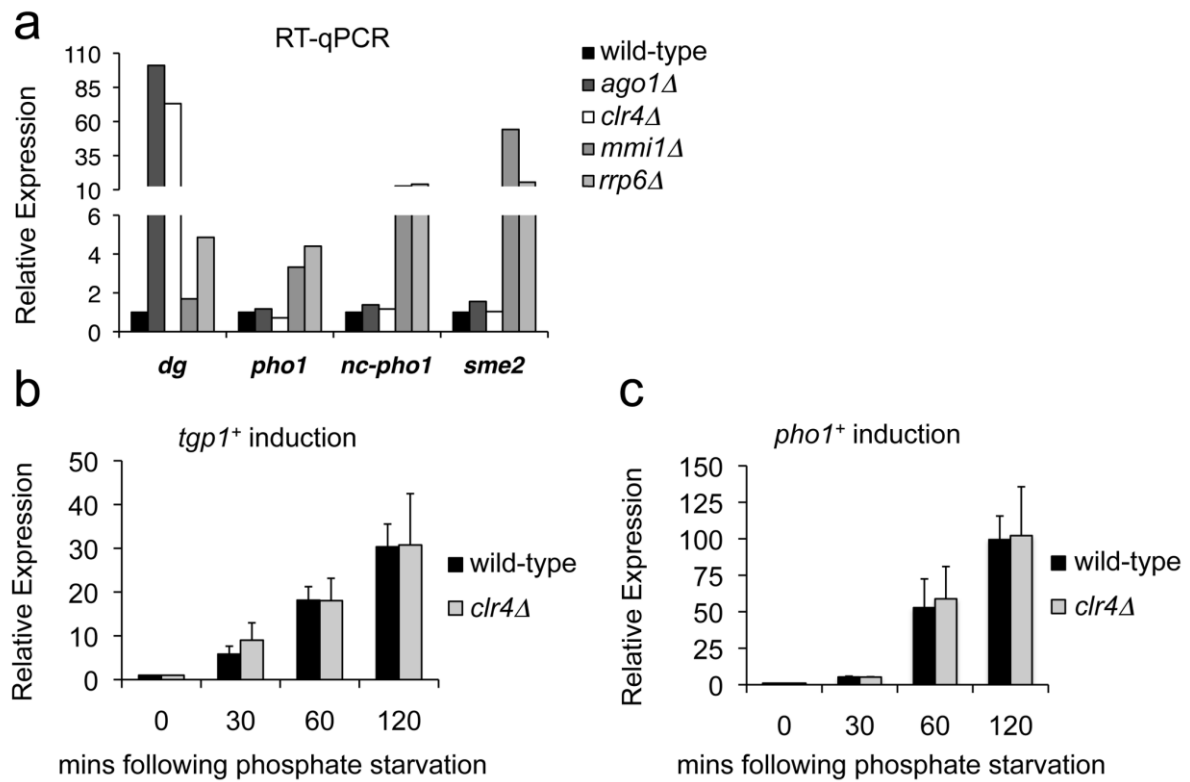

**Supplementary Figure 7. Transcript levels in various mutants and conditions.** (a) RT-qPCR experiments to measure *dg* (centromere repeats), *pho1<sup>+</sup>*, *nc-pho1*, and *sme2<sup>+</sup>* transcript levels in wild-type, *ago1Δ*, *clr4Δ*, *mmi1Δ*, and *rrp6Δ*. RNA levels quantified as relative to wild-type after normalization to *act1<sup>+</sup>*. RT-qPCR to measure (b) *tgp1<sup>+</sup>* and (c) *pho1<sup>+</sup>* mRNA induction kinetics following phosphate starvation in wild-type and *clr4Δ* cells. Error bars indicate standard error from two independent experiments.

Ard\_Supplementary-Figure-8

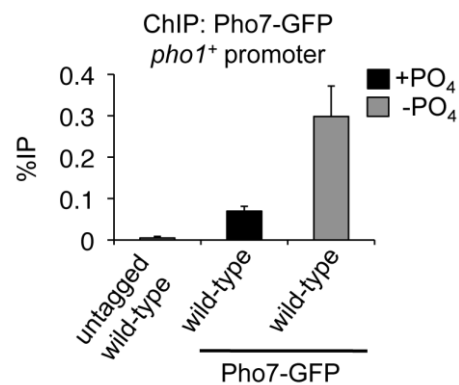

**Supplementary Figure 8. Pho7-GFP accumulates at the *pho1*<sup>+</sup> promoter following phosphate starvation.** The endogenous Pho7 transcription factor was C-terminally tagged with GFP in wild-type cells. GFP ChIP experiments were performed in the presence or absence of phosphate. An untagged strain was used as a negative control. Pho7-GFP levels at the *pho1*<sup>+</sup> promoter were measured by qPCR and quantified as %IP (ChIP/Input); error bars indicate standard error from three independent experiments.



Ard\_Supplementary-Figure-9

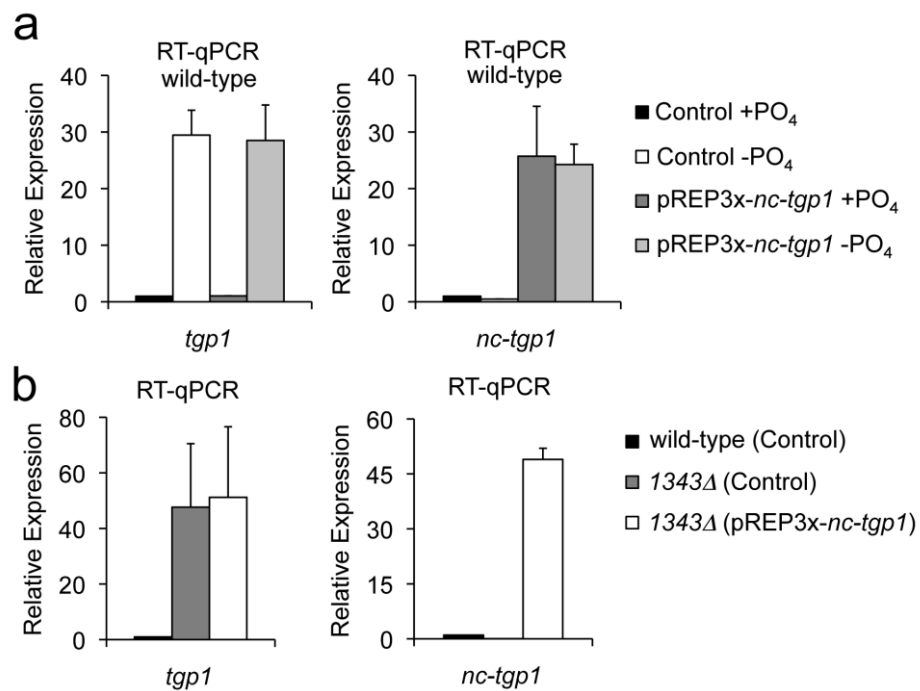

**Supplementary Figure 9. *nc-tgp1* does not repress *tgp1*<sup>+</sup> *in trans*.** RT-qPCR

experiments to measure *tgp1*<sup>+</sup> mRNA and *nc-tgp1* lncRNA levels in (a) wild-type responding to phosphate availability, and (b) 1343Δ cells, each transformed with an empty pREP3x vector (Control) or pREP3x vector containing *nc-tgp1* under the control of the strong *nmt1* promoter (pREP3x-*nc-tgp1*). Error bars indicate standard error from two independent experiments.

**Supplementary Table 1. List of *S. pombe* strains used in this study.**

| Name                                    | ID #  | Genotype                                                                                      | Source        |
|-----------------------------------------|-------|-----------------------------------------------------------------------------------------------|---------------|
| wild-type                               | 143   | "972 h-"                                                                                      | Lab stock     |
| wild-type                               | 1645  | <i>h+ ade6-210 arg3-D4 his3-D1 leu1-32 ura4-D18</i>                                           | Lab stock     |
| wild-type                               | 1646  | <i>h- ade6-210 arg3-D4 his3-D1 leu1-32 ura4-D18</i>                                           | Lab stock     |
| <i>rrp6Δ</i>                            | 7865  | <i>h+ rrp6Δ::kan ade6-210 ura4-D18 leu1-32</i>                                                | Lab stock     |
| <i>ago1Δ</i>                            | 8061  | <i>h+ ago1Δ::ura4 otr1R(SphI):ade6+ ura4-D18 leu1-32 ade6-M210</i>                            | Lab stock     |
| <i>dcr1Δ</i>                            | 8146  | <i>h? dcr1Δ::KAN (G418R) ade6-210</i>                                                         | Lab stock     |
| <i>swi6Δ</i>                            | 951   | <i>h90 swi6Δ::ura4 ura4-D18</i>                                                               | Lab stock     |
| <i>clr4Δ</i>                            | 8435  | <i>h- clr4Δ::ura4 his7-366 ade6-210/216 leu1-32 ura4-D18</i>                                  | Lab stock     |
| <i>dis3-54</i>                          | A1264 | <i>h+ dis3-54 ade6-216 leu1-32 arg3-D4</i>                                                    | Lab stock     |
| <i>1343Δ::ura4<sup>+</sup></i>          | A9016 | <i>h+ SPNCRNA.1343Δ::ura4<sup>+</sup>ade6-210 arg3-D4 his3-D1 leu1-32 ura4-D18</i>            | This study    |
| <i>1343Δ</i>                            | A9032 | <i>h+ SPNCRNA.1343Δ ade6-210 arg3-D4 his3-D1 leu1-32 ura4-18</i>                              | This study    |
| <i>tgp1Δ1343Δ</i>                       | A9352 | <i>h+ 1343Δ tgp1Δ::ura4<sup>+</sup> ade6-210 arg3-D4 his3-D1 leu1-32 ura4-D18</i>             | This study    |
| <i>red1Δ</i>                            | A9392 | <i>h90 red1Δ::kan leu1-32 ura4-D18 ade6-M210</i>                                              | Sugiyama, T.  |
| <i>mmi1Δ</i>                            | A9393 | <i>h- mmi1Δ::kan leu1-32 mei4-P572</i>                                                        | Sugiyama, T.  |
| <i>AΔ</i>                               | A9520 | <i>h+ 1343AΔ ade6-210 arg3-D4 his3-D1 leu1-32 ura4-D18</i>                                    | This study    |
| <i>BΔ</i>                               | A9522 | <i>h+ 1343BΔ ade6-210 arg3-D4 his3-D1 leu1-32 ura4-D18</i>                                    | This study    |
| <i>nc-tgp1::ura4<sup>+</sup></i>        | A9523 | <i>h+ nc-tgp1::ura4+ ade6-210 arg3-D4 his3-D1 leu1-32 ura4-D18</i>                            | This study    |
| <i>Pho7-GFP</i>                         | A9827 | <i>h- pho7-GFP:NAT ade6-210 arg3-D4 his3-D1 leu1-32 ura4-D18</i>                              | This study    |
| <i>Pho7-GFP/1343Δ::ura4<sup>+</sup></i> | A9974 | <i>h- pho7-GFP:NAT 1343Δ::ura4<sup>+</sup>ade6-210 arg3-D4 his3-D1 leu1-32 ura4-D18</i>       | This study    |
| <i>103Δ</i>                             | A9027 | <i>h+ SPNCRNA.103Δ ade6-210 arg3-D4 his3-D1 leu1-32 ura4-18</i>                               | This study    |
| <i>214Δ</i>                             | A9028 | <i>h+ SPNCRNA.214Δ ade6-210 arg3-D4 his3-D1 leu1-32 ura4-18</i>                               | This study    |
| <i>388Δ</i>                             | A9029 | <i>h+ SPNCRNA.388Δ ade6-210 arg3-D4 his3-D1 leu1-32 ura4-18</i>                               | This study    |
| <i>808Δ</i>                             | A9030 | <i>h+ SPNCRNA.808Δ ade6-210 arg3-D4 his3-D1 leu1-32 ura4-18</i>                               | This study    |
| <i>879Δ</i>                             | A9031 | <i>h+ SPNCRNA.879Δ ade6-210 arg3-D4 his3-D1 leu1-32 ura4-18</i>                               | This study    |
| <i>1443Δ</i>                            | A9033 | <i>h+ SPNCRNA.1443Δ ade6-210 arg3-D4 his3-D1 leu1-32 ura4-18</i>                              | This study    |
| <i>1556Δ</i>                            | A9034 | <i>h+ SPNCRNA.1556Δ ade6-210 arg3-D4 his3-D1 leu1-32 ura4-18</i>                              | This study    |
| <i>nmt1-nc-tgp1</i>                     | B0200 | <i>h- nc-tgp1-promoter:nmt1-NAT ade6-210 arg3-D4 his3-D1 leu1-32 ura4-D18</i>                 | This study    |
| <i>cnp1-1</i>                           | 6960  | <i>h- leu1-32 ura4-D18 cnp1Δ::ura4 lys1::cnp1-1</i>                                           | Lab stock     |
| <i>Mmi1-HTP</i>                         | B0398 | <i>h+ mmi1-his6-TEV-ProA::KAN MX imr1R(NcoI)::ura4<sup>+</sup> ura4D-18 ade6-M216 leu1-32</i> | Vasilieva, L. |

**Supplementary Table 2. List of oligonucleotides used in this study.**

| <b>Name</b>              | <b>Sequence</b>                       |
|--------------------------|---------------------------------------|
| qAct1_F                  | GGTTTCGCTGGAGATGATG                   |
| qAct1_R                  | ATACCACGCTTGCTTTGAG                   |
| qSme2_F                  | AAACAAGGGAGGTAACAGACTTAG              |
| qSme2_R                  | GCATGCATATTCCGTCTTACAATAG             |
| q1271.10c_F              | CGCTTCGTATCTTTCTCTTTCC                |
| q1271.10c_R              | CCAGTCCTCTTCTTCGGTTGTA                |
| q1271.09a_F (PP: 1*)     | TCGGTTGGAATGTTCTAATCAATAC             |
| q1271.09a_R (PP: 1*)     | AGACCGGTGATCAAACAATATTTAG             |
| q1271.09b_F (PP: 2*)     | TGAAGTAGTTAGACAGGTTAGCGA              |
| q1271.09b_R (PP: 2*)     | CTTGTCGTCCAACCTTCTCTTCATC             |
| qnctgp1c_F (PP: 3; pro*) | GGCAGTAAATCTATCTGTAGCGAGT             |
| qnctgp1c_R (PP: 3; pro*) | TACACGGTAAATGTCAAGTCTGCTA             |
| qnctgp1b_F (PP: 4*)      | CTGACAAACCAATTATCCCTACACG             |
| qnctgp1b_R (PP: 4*)      | GTATTACGATTTGGCAACCTCATCC             |
| qnctgp1a_F (PP: 5*)      | TTAAATGCTGCACTCACATACTGAC             |
| qnctgp1a_R (PP: 5*)      | ACTCTCCCTTGGGTTCAATTTGATTA            |
| qncRNA1343_F (PP: 6*)    | ATACAGACGTGTGGATTGCAA                 |
| qncRNA1343_R (PP: 6*)    | CCTCTTCTATACGCAATCAATGTC              |
| q1271.08c_F              | TTCAAGGAGCATTTCATTCTAAAC              |
| q1271.08c_R              | TATGTATCGTTAGTTATGCCTCGTG             |
| qMug96_F                 | CATCCTATGTTTATTTGTCTGTTGC             |
| qMug96_R                 | CTCATGATGGTCCTTAAACCTATTG             |
| qPho1_F                  | CTTTGGACCCTCTAATACATCCGAT             |
| qPho1_R                  | AAGAGTGTCAAAGTTCTGGATACCA             |
| qncPho1_F                | ATGATGTTTGAGATTTACGGGAAGT             |
| qncPho1_R                | TTCTGTAAATGTGTCCCGAACCAAA             |
| qDg_F                    | AATTGTGGTGGTGTGGTAATAC                |
| qDg_R                    | GGGTTTCATCGTTTCCATTTCAG               |
| lacZ_1_F                 | TACTACGTCGACCGACTGACCTCAAACCAAACAGCA  |
| lacZ_1_R                 | TACTACCTGCAGTCACTAATGTCATACTCGGCTTGAG |
| lacZ_2_F                 | TACTACCTGCAGCGACTGACCTCAAACCAAACAGCA  |
| lacZ_2_R                 | TACTACGTCGACTCACTAATGTCATACTCGGCTTGAG |
| nc-tgp1_Sall_F           | TACTACGTCGACCATATCCAAATATGGAAACT      |
| nc-tgp1_XmaI_R           | TACTACCCCGGGCTGCCGACTTACAAGTCTCG      |

\*(PP: primer pairs; pro: promoter)
